# Supplementary material for: Activated Drp1-mediated mitochondrial ROS influence the gut microbiome and intestinal barrier after hemorrhagic shock
Source: publisher site journal article supplement (doi:10.18632/aging.102690), 2020-01-18
Supplement: Supplementary file [file aging-v12i2-102690-supplementary-material-SD1.pdf]

SUPPLEMENTARY FIGURES

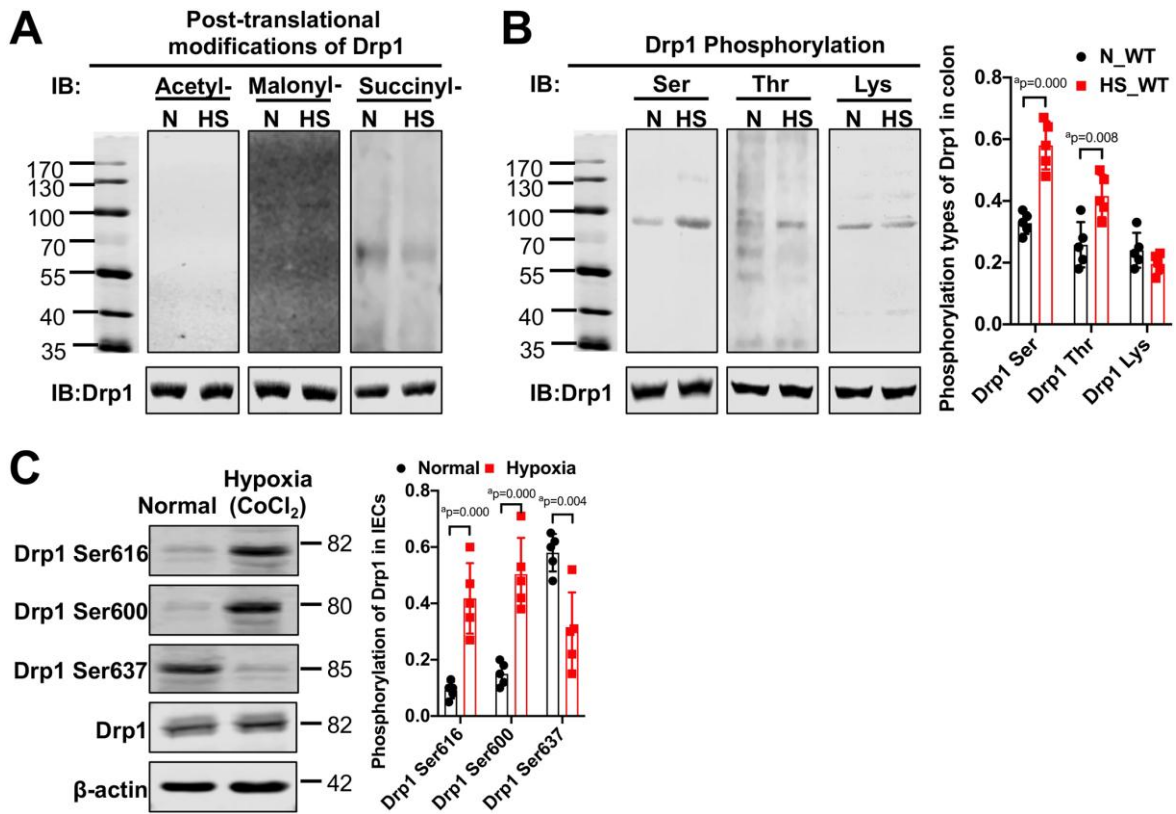

**Supplementary Figure 1. Post-translational modifications of Drp1 after shock or hypoxia.** (A) Some types of Drp1 modifications after shock in colon tissues. N, N\_WT group; HS, HS\_WT group; Acetyl-, acetylation; Malonyl-, malonylation; Succinyl-, succinylation. (B) Different types of Drp1 phosphorylation types after shock in colon tissues. Ser, Serine; Thr, Threonine; Lys, Lysine. (n=5) (C) The phosphorylation of Drp1 after CoCl<sub>2</sub>-induced hypoxia in IECs (n=5). a represents p < 0.05 compared with N\_WT group or Normal group.

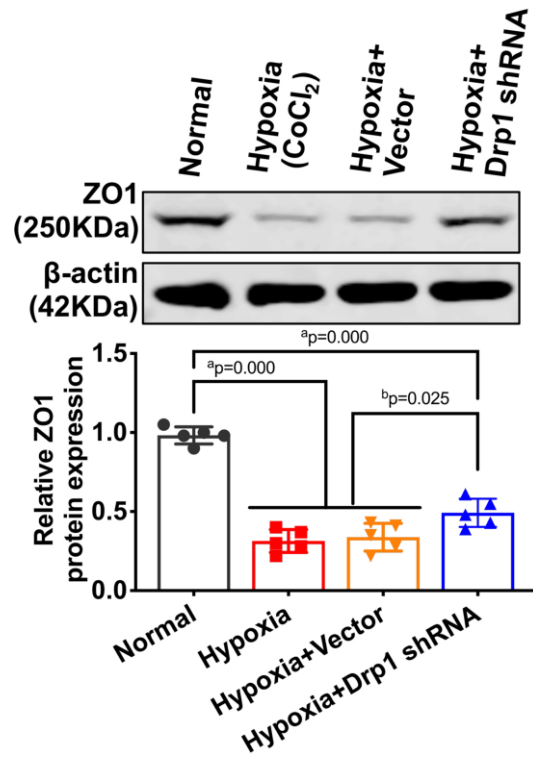

**Supplementary Figure 2.** The ZOI protein expression of hypoxia-treated IECs after Drp1 shRNA. (n=5) a represents  $p < 0.05$  compared with Normal group; b represents  $p < 0.05$  compared with Hypoxia group.

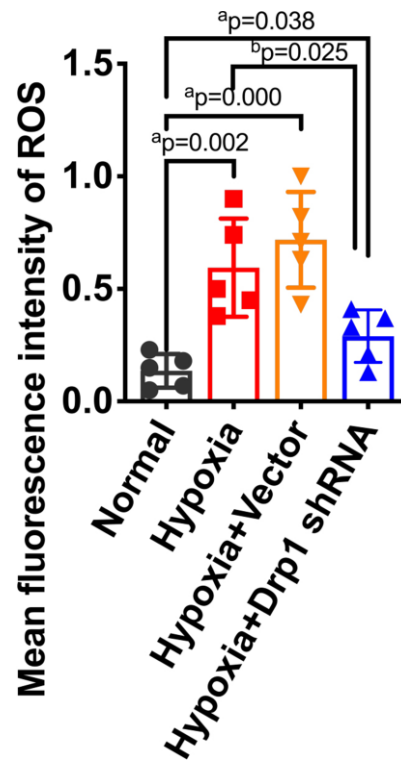

**Supplementary Figure 3.** The ROS fluorescence intensity of hypoxia-treated IECs after Drp1 shRNA. The statistical results of Figure 6B (n=5). a represents  $p < 0.05$  compared with Normal group; b represents  $p < 0.05$  compared with Hypoxia group.

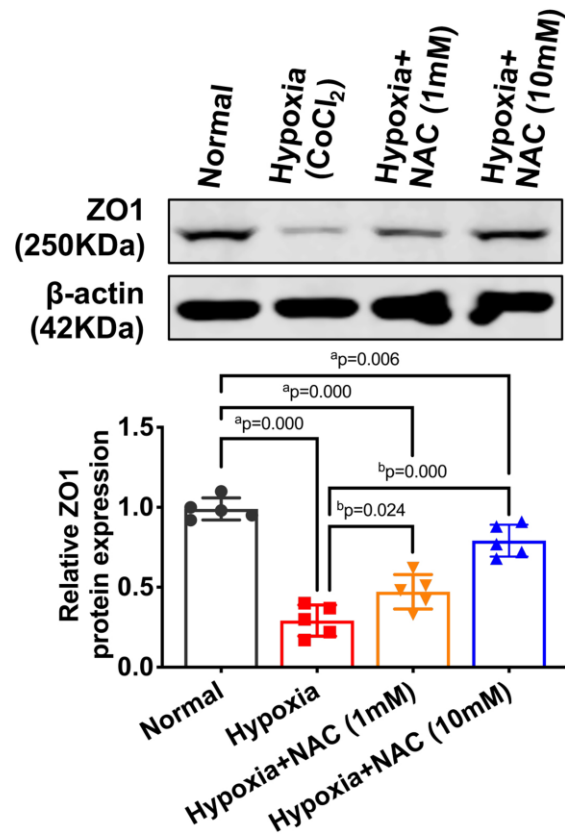

**Supplementary Figure 4. The ZO1 protein expression of hypoxia-treated IECs after ROS intervention.** (n=5) a represents  $p < 0.05$  compared with Normal group; b represents  $p < 0.05$  compared with Hypoxia group.
